# Supplementary material
Source: HighWire-hosted journal article supplement (https://qdcxjkg.com/highwire/filestream/113540/field_highwire_adjunct_files/0/liu_et_al._supplementatext2011-6-23.pdf)
Supplement: liu_et_al._supplementatext2011-6-23.pdf [file liu_et_al._supplementatext2011-6-23.pdf]

## **Supplementary Data**

### **Molecular Genetics and Clinical Features of Chinese IPAH and HPAH Patients**

Dong Liu, MD; Qian-Qian Liu, MD; Melanie Eyries, PhD; Wen-Hui Wu, MD; Ping Yuan, MD;

Rui Zhang, MD; Florent Soubrier, MD, PhD; Zhi-Cheng Jing, MD

**Table 1. Oligonucleotides for PCR and sequencing of the *BMP2* gene**

| Exon | Sense primer                   | Antisense primer              | Annealing (°C) |
|------|--------------------------------|-------------------------------|----------------|
| 1    | 5'-CTTCGTCCTTCCCAGGCAAGT-3'    | 5'-TGGCGAAGGGCAAGCACA-3'      | 63             |
| 2    | 5'-CAGTCATTTTCAGGTAAGGAAAGT-3' | 5'-TGAACAGAAGAACGTCATTGAA-3'  | 56             |
| 3    | 5'-TTGCAAAACTGTTTCATAGCTTA-3'  | 5'-GCTGGCATTACAGGCATGA-3'     | 56             |
| 4    | 5'-CATTTCTTTTGATGCAAAAACA-3'   | 5'-TTGAGGCTGGGTGTATTTTG-3'    | 59             |
| 5    | 5'-CTCCCAGAATTTGGCTTTCAT-3'    | 5'-AAATAGAAGCCCCAGGAGACA-3'   | 59             |
| 6    | 5'-TGGGTCTGGTAGGAGCTTCAT-3'    | 5'-TGGCCTCAAGTGATCCACCT-3'    | 59             |
| 7    | 5'-CCATCCCTTCTCTCTCTCT-3'      | 5'-TGTGAATTTTGAACCCACATGA-3'  | 59             |
| 8    | 5'-GAGTTGAAATTCGATTTCTCT-3'    | 5'-ACCAAAGTGCTGGGATTACA-3'    | 55             |
| 9    | 5'-AATTTGCATCCTGCTGCTAA-3'     | 5'-TTAATGACATGGTTAGGGTCAA-3'  | 57             |
| 10   | 5'-TTTGTGGCATTAGGCAACTC-3'     | 5'-ATGTGCCTGAAGGGGATGAA-3'    | 57             |
| 11   | 5'-CCGTAATCCTTGAAGCCTAA-3'     | 5'-CATTGAACTATTAGGCTGGTTTA-3' | 56             |
| 12-1 | 5'-GTGGGTAAAGCAAGCTAGAAC-3'    | 5'-ATGTACGTTTGGGAAGAAAATGA-3' | 55             |
| 12-2 | 5'-ATGGCCAGCTTGTTGCTCT-3'      | 5'-AGCTAGACCCAAAAGAAGTTGA-3'  | 58             |
| 12-3 | 5'-ATGTTGGCCAGGTTGGTCT-3'      | 5'-CTATCTGGCCAAACAACCAA-3'    | 58             |
| 13   | 5'-TTAGCGAGACTAAACAAAAGTGC-3'  | 5'-TTTTCCTGGAAAAACATTGTCT-3'  | 57             |

**Table 2. The damaging effect of the splice-site mutations predicted by the software**

| Patient ID | Mutation |            | Splice Site                          |                                      |                                      |                                        |                             | Comments |
|------------|----------|------------|--------------------------------------|--------------------------------------|--------------------------------------|----------------------------------------|-----------------------------|----------|
|            | Location | Variant*   | Finder                               | MaxEnt                               | Nnsplice                             | Genesplicer                            |                             |          |
| 498        | intron 7 | c.967+5G>C | Primary                              | Primary                              | Primary                              |                                        |                             |          |
|            |          |            | donor splice site slightly decreased | donor splice site slightly decreased | donor splice site slightly decreased | Primary donor splice-site destroyed    | Possible effect on splicing |          |
| 370        | exon8    | c.969T>C   | No effect predicted                  | decreased (-9.8%)                    | No effect predicted                  |                                        |                             |          |
|            |          |            |                                      |                                      |                                      | Primary acceptor splice site destroyed | Possible effect on splicing |          |

\* Abbreviations are in accord with nomenclature guidelines as recommended by the Human Genome Variation Society (<http://www.hgvs.org/mutnomen/>). The letter c. indicates coding DNA, where nucleotide 1 is the A of the ATG translation initiation codon.

**Table 3. Polymorphisms in the coding region found in the general population**

| Location | Domain | Nucleotide Change* | Amino Acid Change† | Allele Frequency                                                                    |
|----------|--------|--------------------|--------------------|-------------------------------------------------------------------------------------|
| 5'UTR    |        | c.-93A>G           |                    | 0.84% of G allele (n=4 of 474 chromosomes) in the Chinese population in this study  |
| exon2    | ECD    | c.165T>C           | p.Asn55Asn         | 0.14% of C allele (n=1 of 710 chromosomes) in the Chinese population in this study  |
| exon12   | CD     | c.2379A>C          | p.Thr793Thr        | 0.14% of C allele (n=1 of 710 chromosomes) in the Chinese population in this study  |
| exon12   | CD     | c.2811G>A          | p.Arg937Arg        | 7.04% of A allele (n=50 of 710 chromosomes) in the Chinese population in this study |

\* Abbreviations are in agreement with nomenclature guidelines as recommended by the Human Genome Variation Society (<http://www.hgvs.org/mutnomen/>). The letter c. indicates the numbering of the base change, where nucleotide 1 is the A of the ATG translation initiation codon.

† The letter p. is used to indicate the change at the protein level.

UTR = untranslated region; ECD = extracellular domain; CD = cytoplasmic domain.
